# Supplementary material for: Prevalence and determinants of return to work after various coronary events: meta-analysis of prospective studies
Source: PubMed Central journal article supplement (PMC9468005; doi:10.1038/s41598-022-19467-z), 2022-09-12

**Supplementary Figure S1.** NOS scale scores for the studies included in the meta-analysis

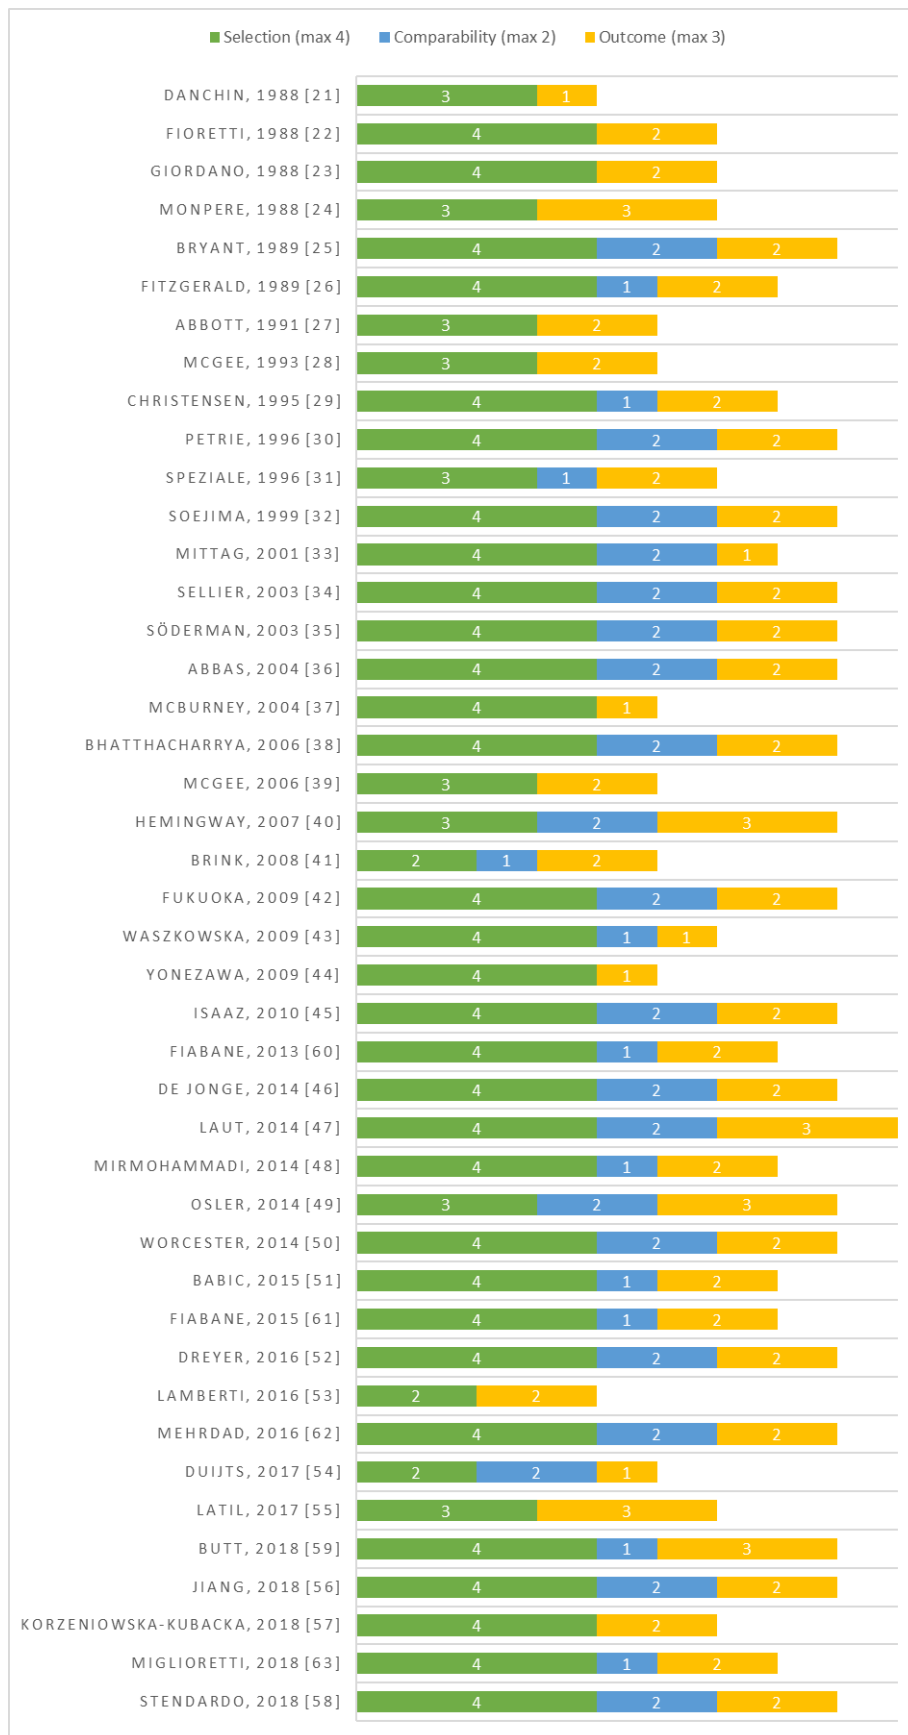

**Supplementary Figure S2.** Random-effects meta-analysis of return-to-work prevalence considering the longest follow-up. The squares and horizontal lines correspond to the study-specific prevalence and 95% CIs.

Proportionally sized boxes represent the weight of each study. The diamond represents the pooled prevalence and 95% CI of the overall population. The horizontal thick line corresponds to the 95% prediction interval

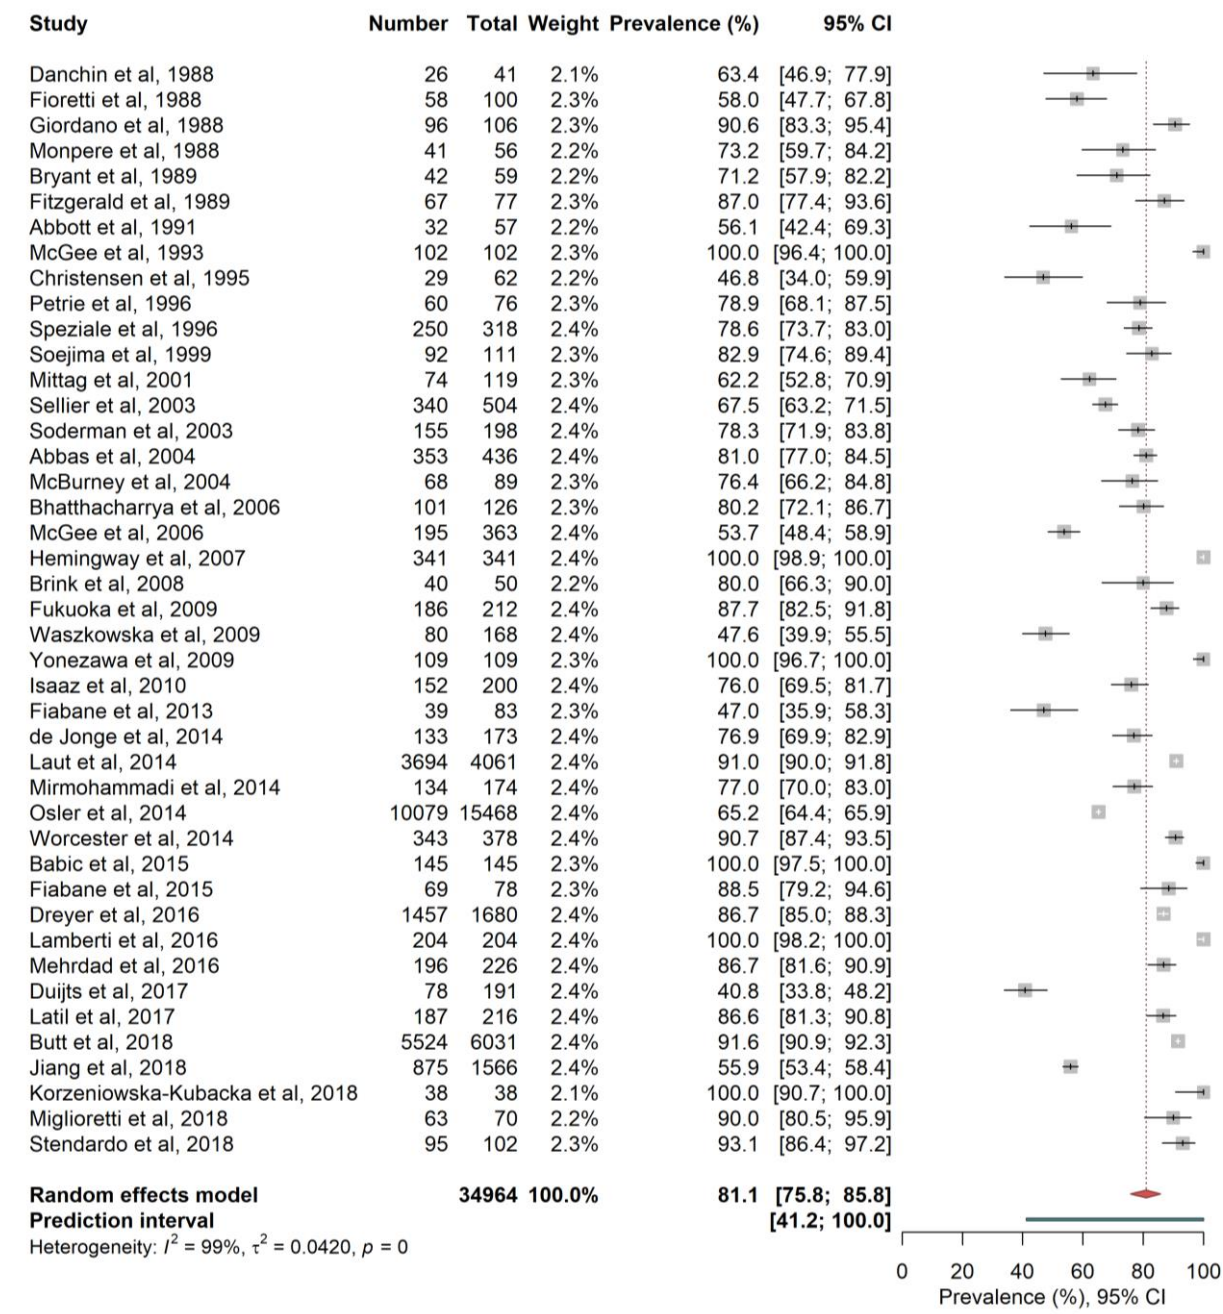

**Supplementary Figure S3.** Funnel plot, Begg's and Egger's tests to assess the presence of publication bias (considering the longest follow-up for each study)

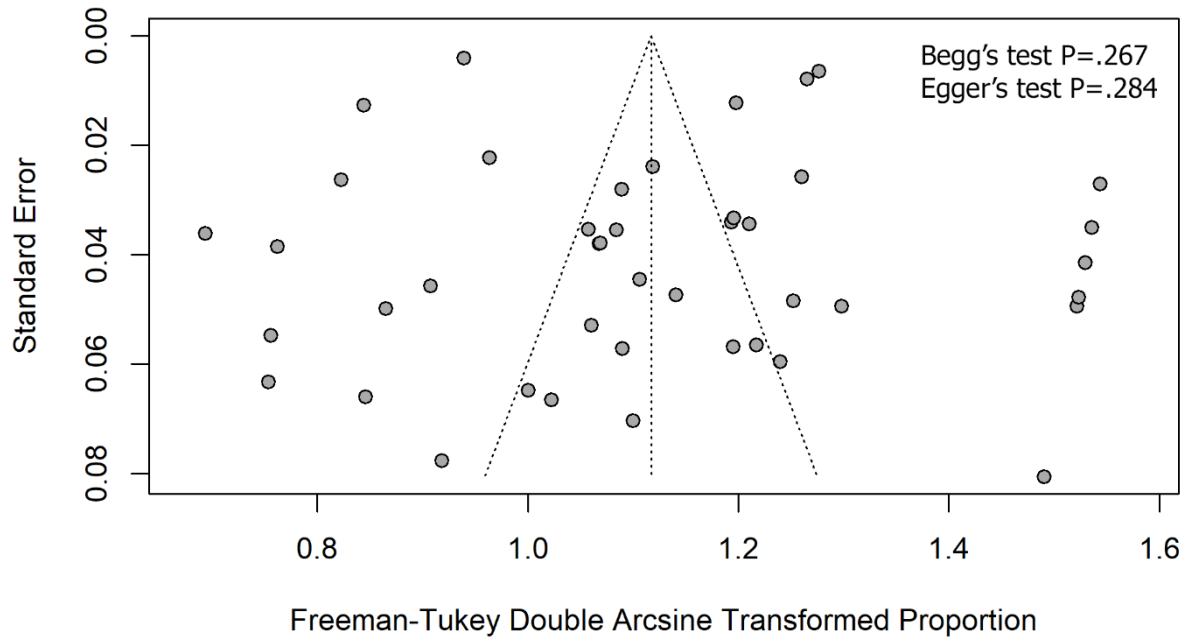

**Supplementary Figure S4.** Random-effects meta-analysis of return-to-work prevalence according to follow-up time. The squares and horizontal lines correspond to the study-specific prevalence and 95% CIs. Proportionally sized boxes represent the weight of each study. The diamond represents the pooled prevalence and 95% CI of the overall population. The horizontal thick line corresponds to the 95% prediction interval

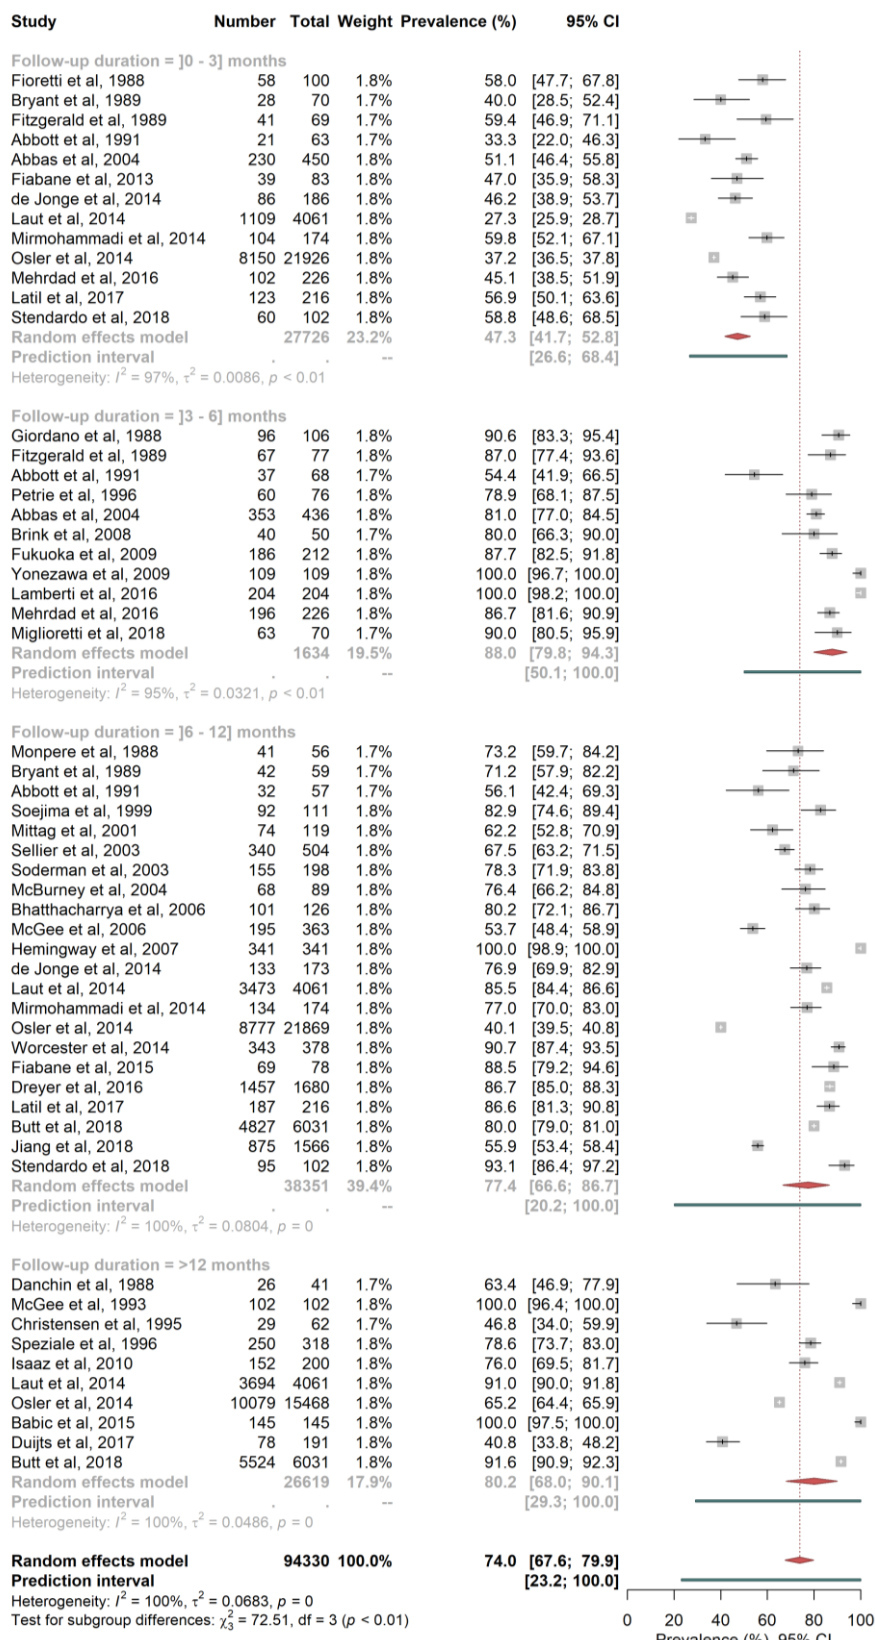

**Supplementary Figure S5.** Random-effects meta-analysis of return-to-work prevalence according to recruitment date. The squares and horizontal lines correspond to the study-specific prevalence and 95% CIs. Proportionally sized boxes represent the weight of each study. The diamond represents the pooled prevalence and 95% CI of the overall population. The horizontal thick line corresponds to the 95% prediction interval

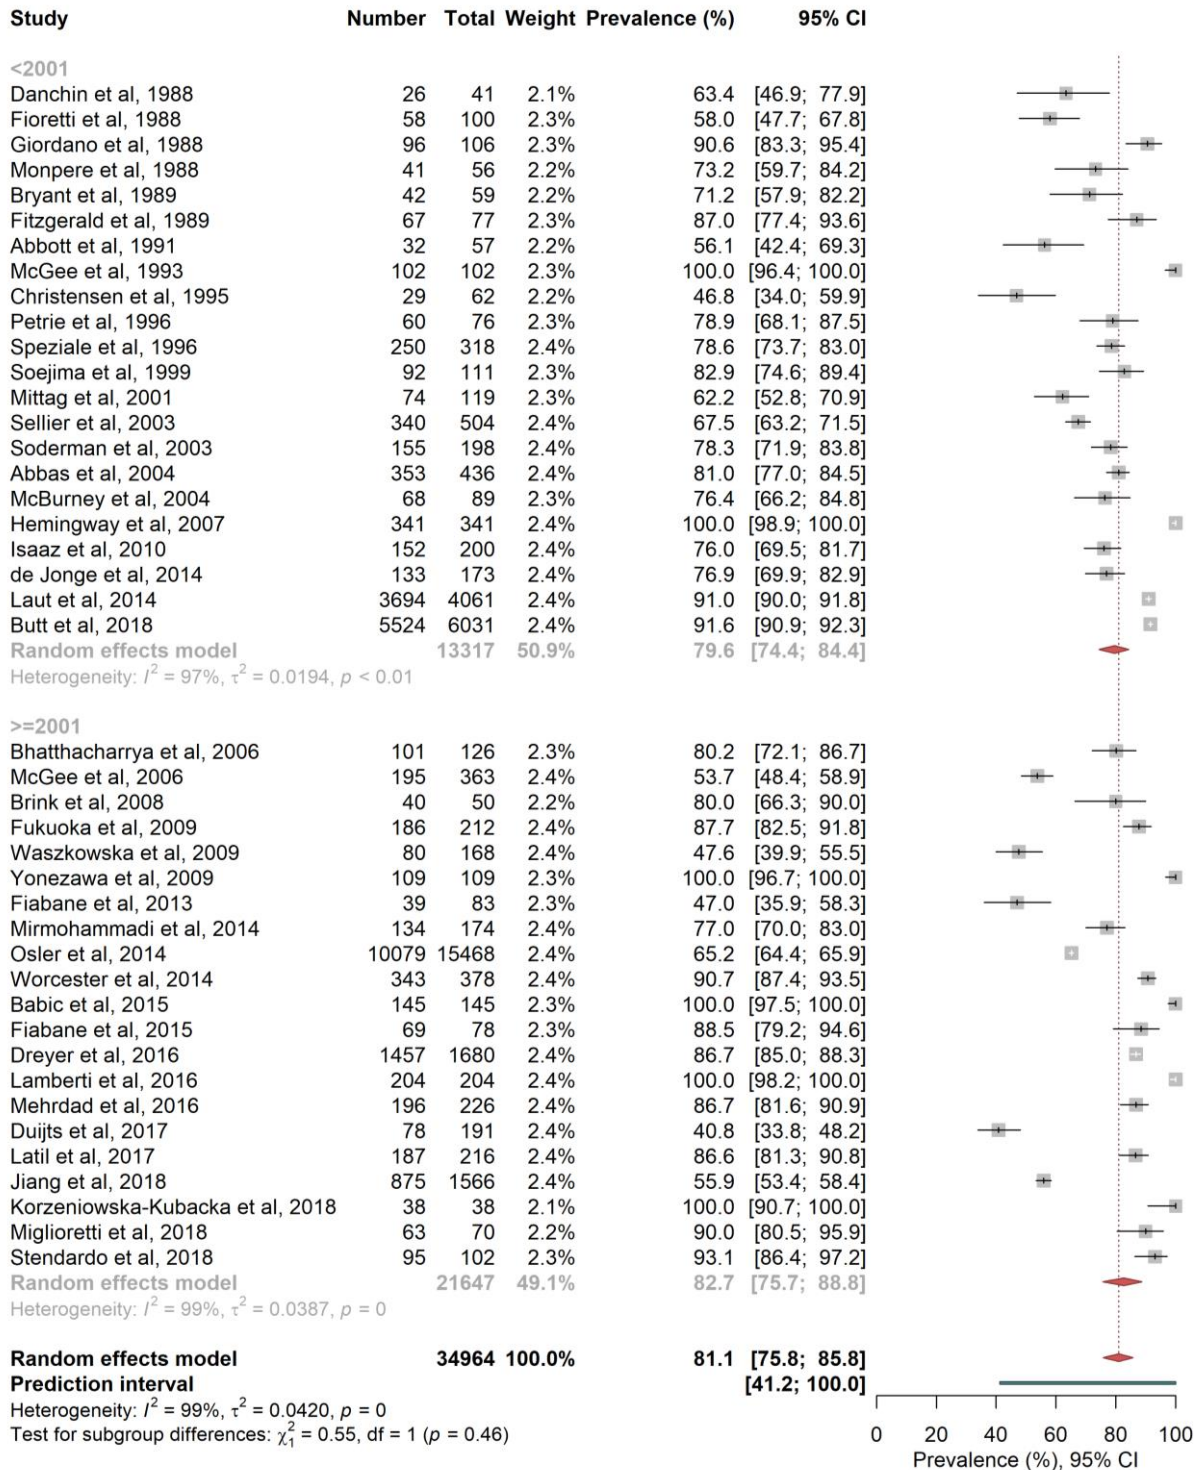

**Supplementary Figure S6.** Random-effects meta-analysis of return-to-work prevalence according to disease definition. The squares and horizontal lines correspond to the study-specific prevalence and 95% CIs.

Proportionally sized boxes represent the weight of each study. The diamond represents the pooled prevalence and 95% CI of the overall population. The horizontal thick line corresponds to the 95% prediction interval

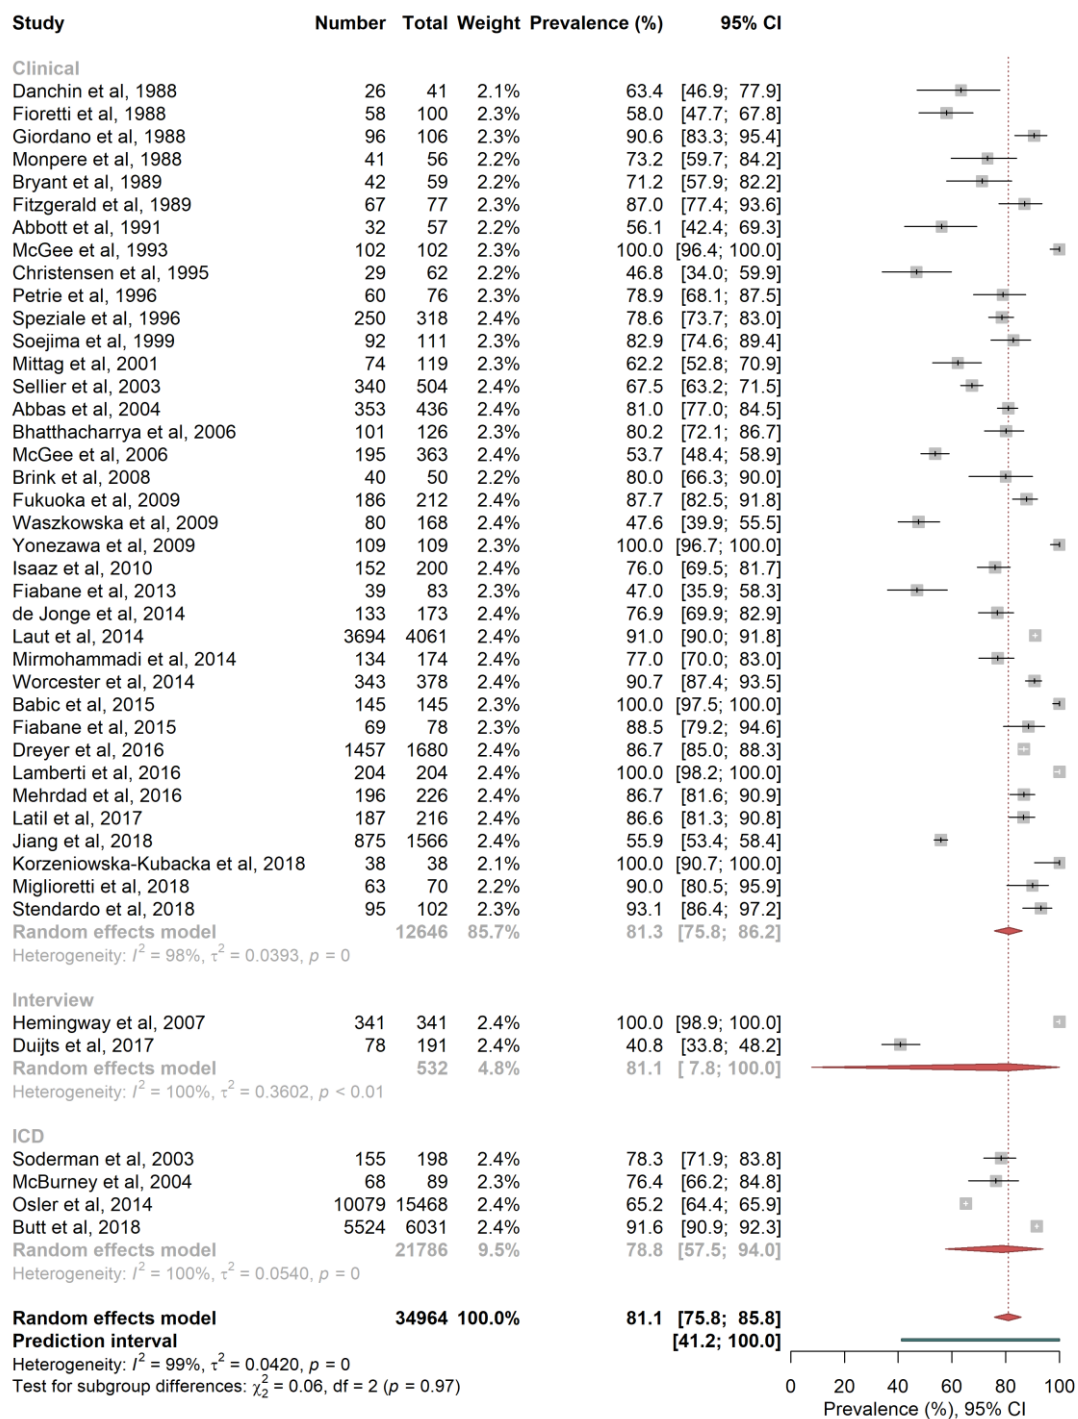

**Supplementary Figure S7.** Random-effects meta-analysis of return-to-work prevalence according to outcome measure method. The squares and horizontal lines correspond to the study-specific prevalence and 95% CIs. Proportionally sized boxes represent the weight of each study. The diamond represents the pooled prevalence and 95% CI of the overall population. The horizontal thick line corresponds to the 95% prediction interval

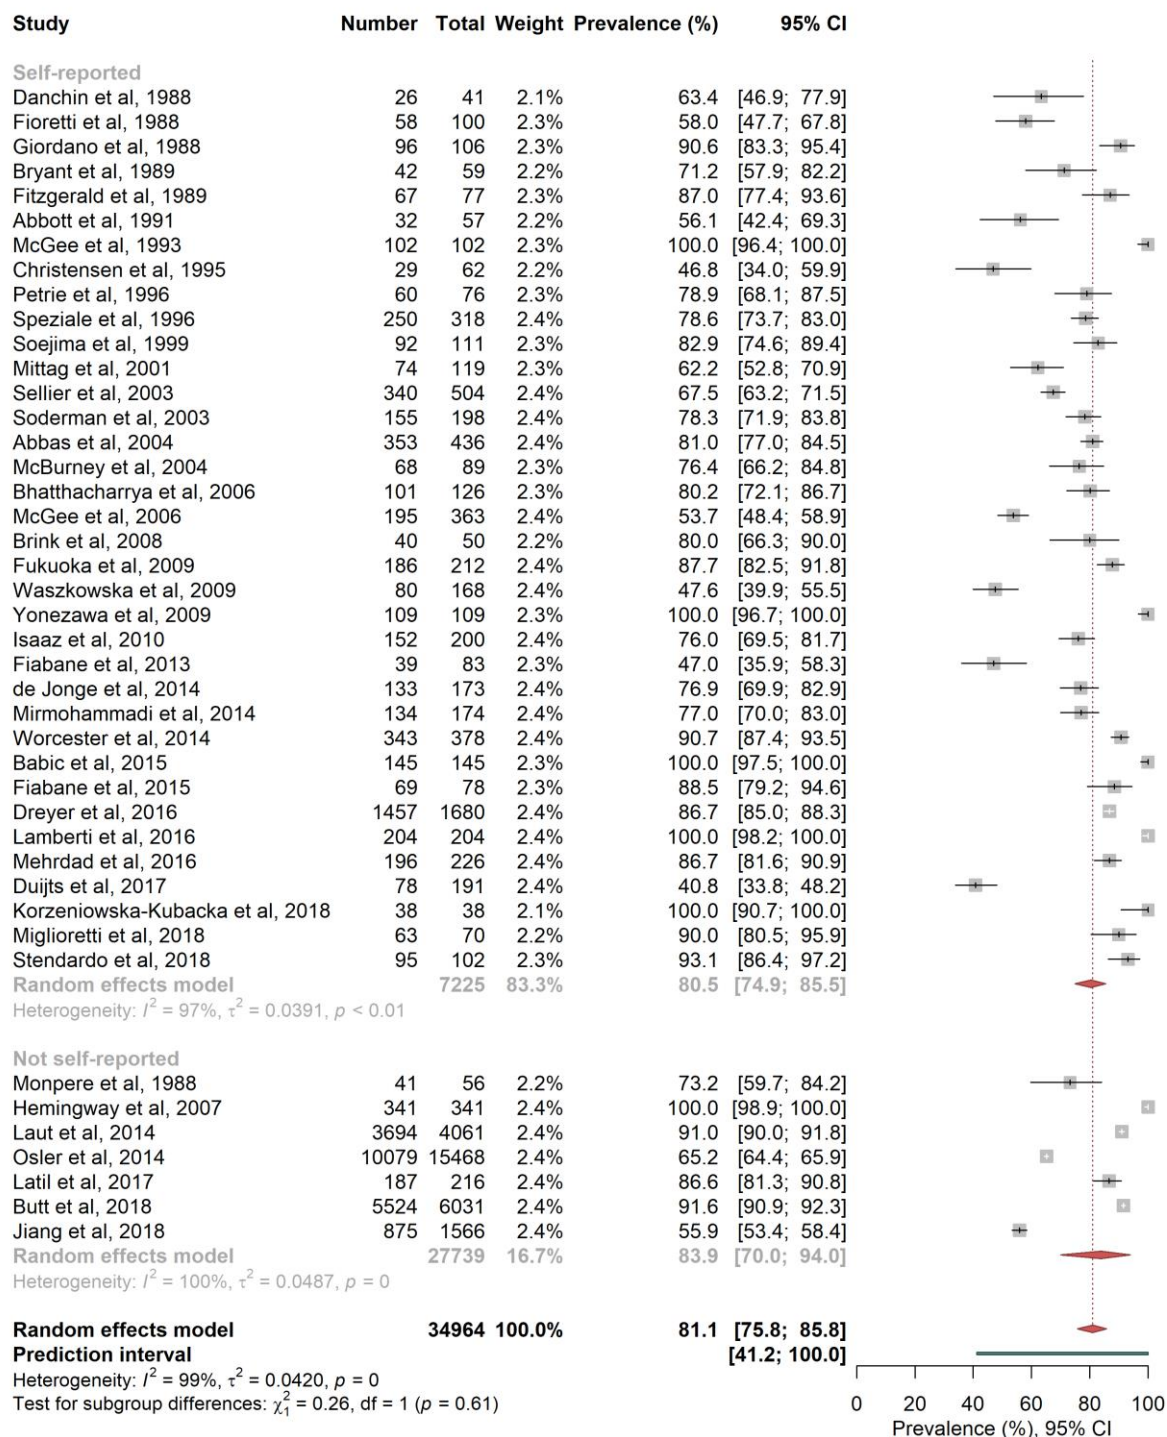

**Supplementary Figure S8.** Random-effects meta-analysis of return-to-work prevalence according to study quality. The squares and horizontal lines correspond to the study-specific prevalence and 95% CIs. Proportionally sized boxes represent the weight of each study. The diamond represents the pooled prevalence and 95% CI of the overall population. The horizontal thick line corresponds to the 95% prediction interval

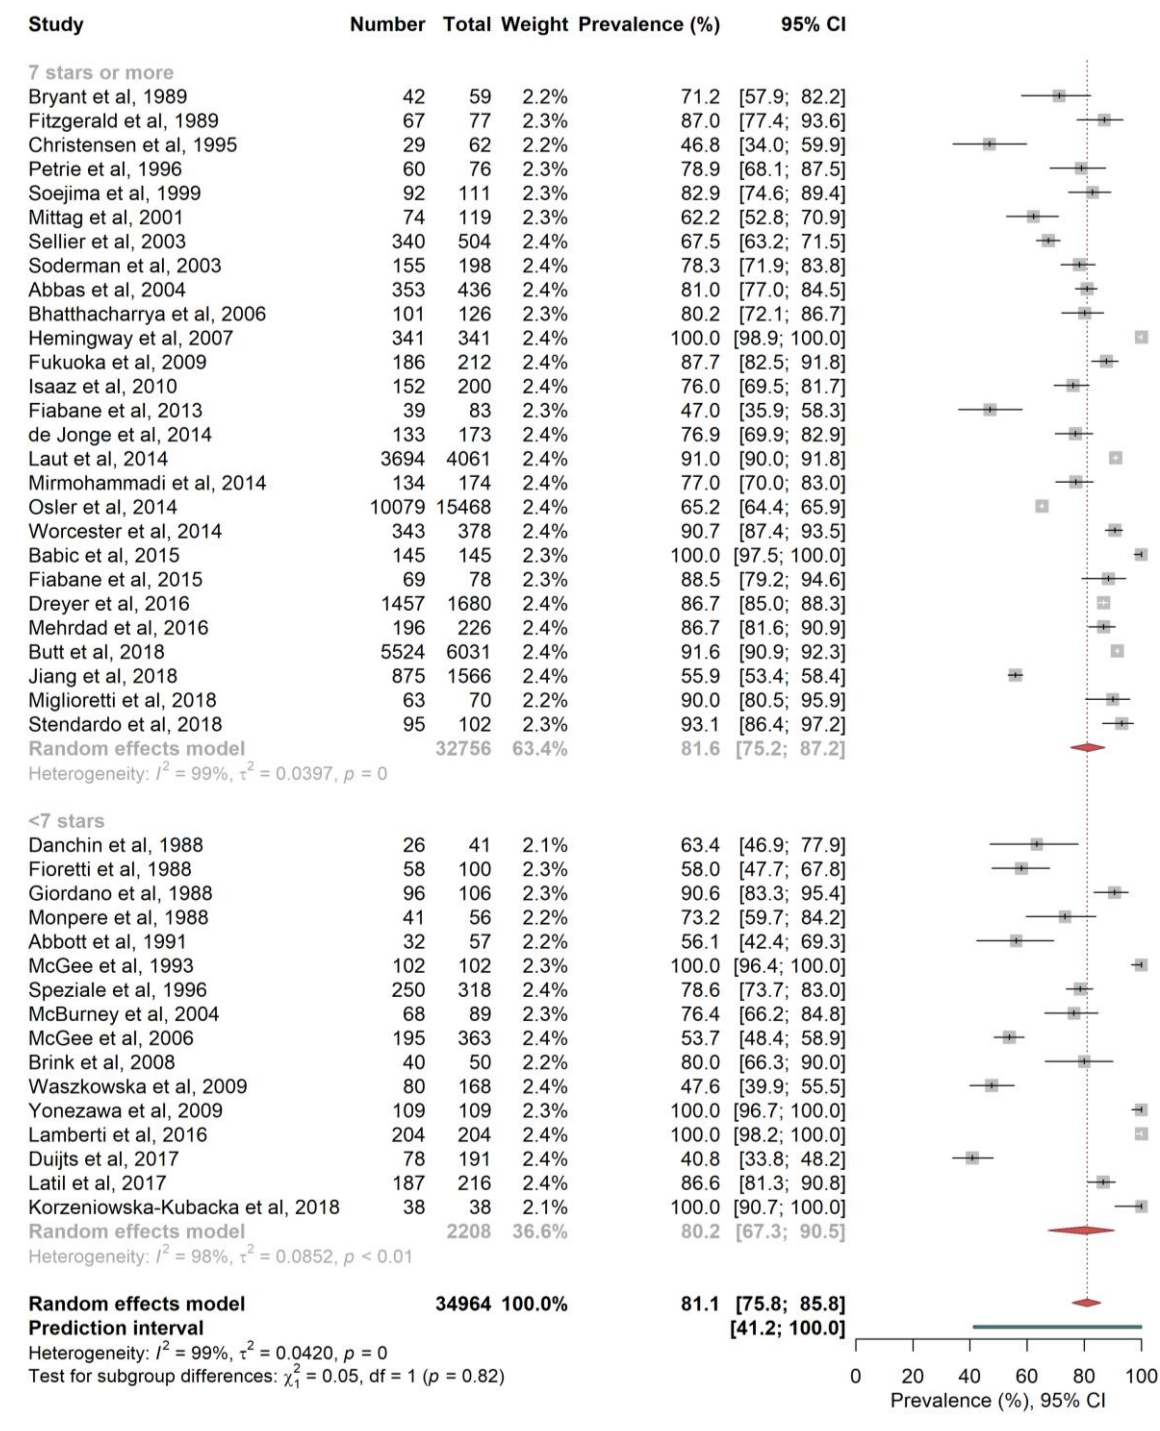



**Supplementary Figure S9.** Random-effects meta-analysis of return-to-work prevalence according to study location. The squares and horizontal lines correspond to the study-specific prevalence and 95% CIs. Proportionally sized boxes represent the weight of each study. The diamond represents the pooled prevalence and 95% CI of the overall population. The horizontal thick line corresponds to the 95% prediction interval

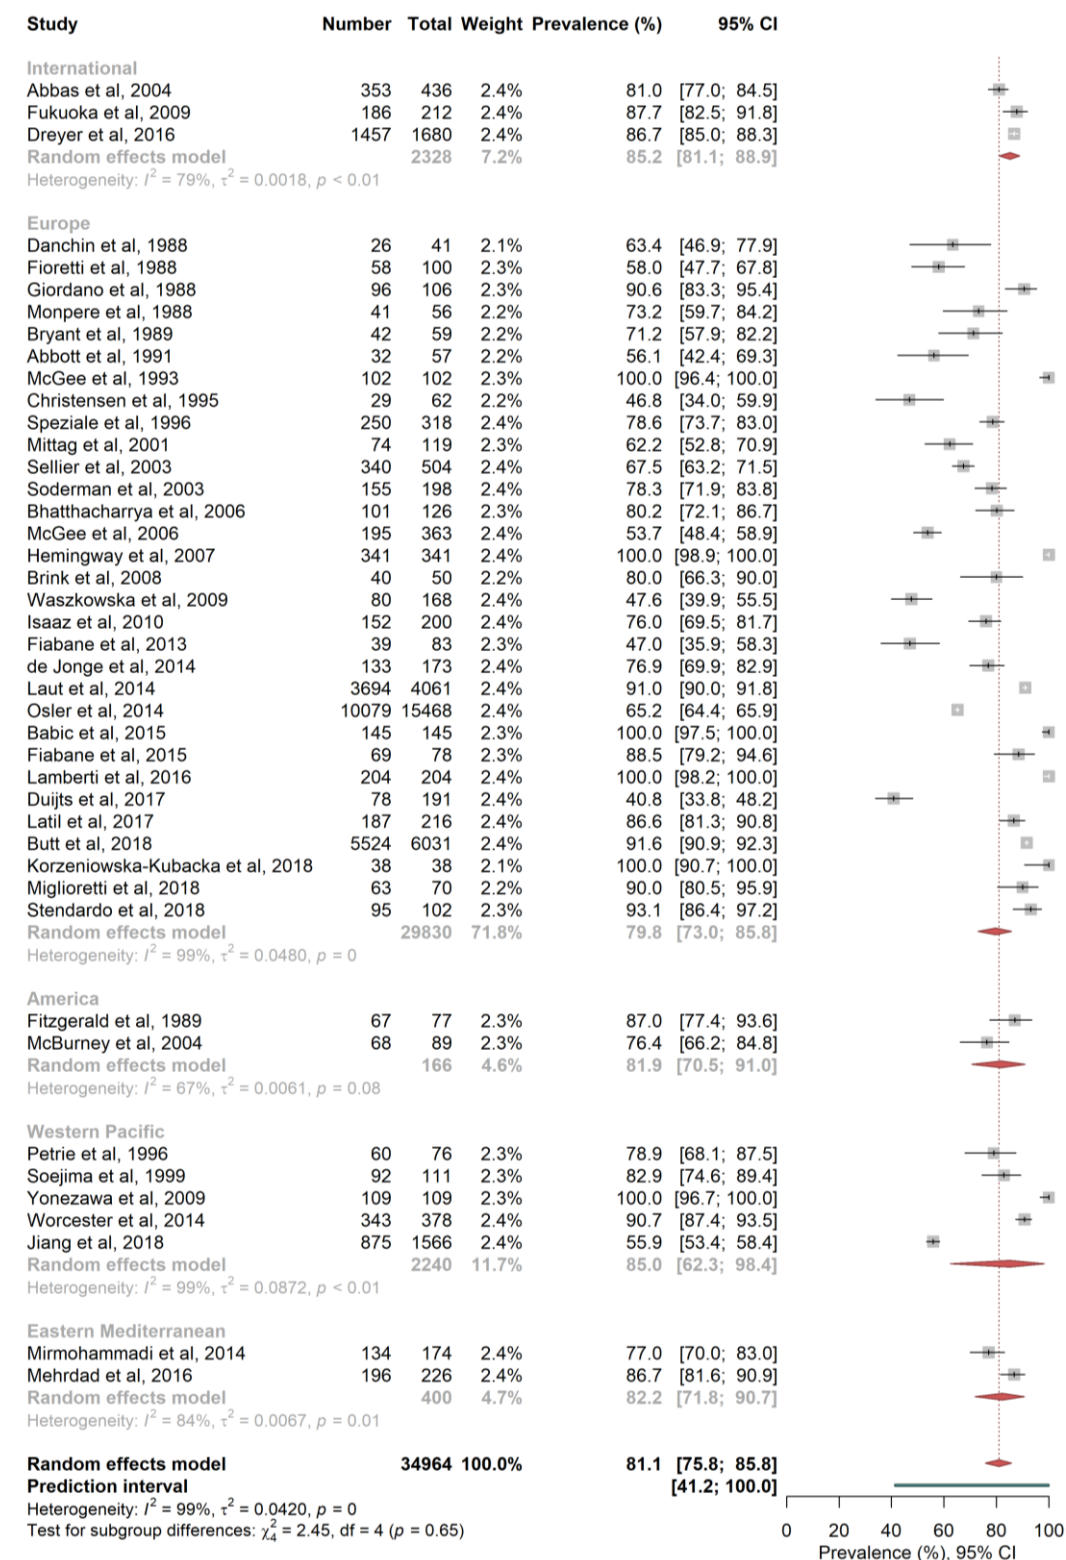

**Supplementary Figure S10.** Random-effects meta-analysis of return-to-work prevalence according to gender. The squares and horizontal lines correspond to the study-specific prevalence and 95% CIs. Proportionally sized boxes represent the weight of each study. The diamond represents the pooled prevalence and 95% CI of the overall population. The horizontal thick line corresponds to the 95% prediction interval

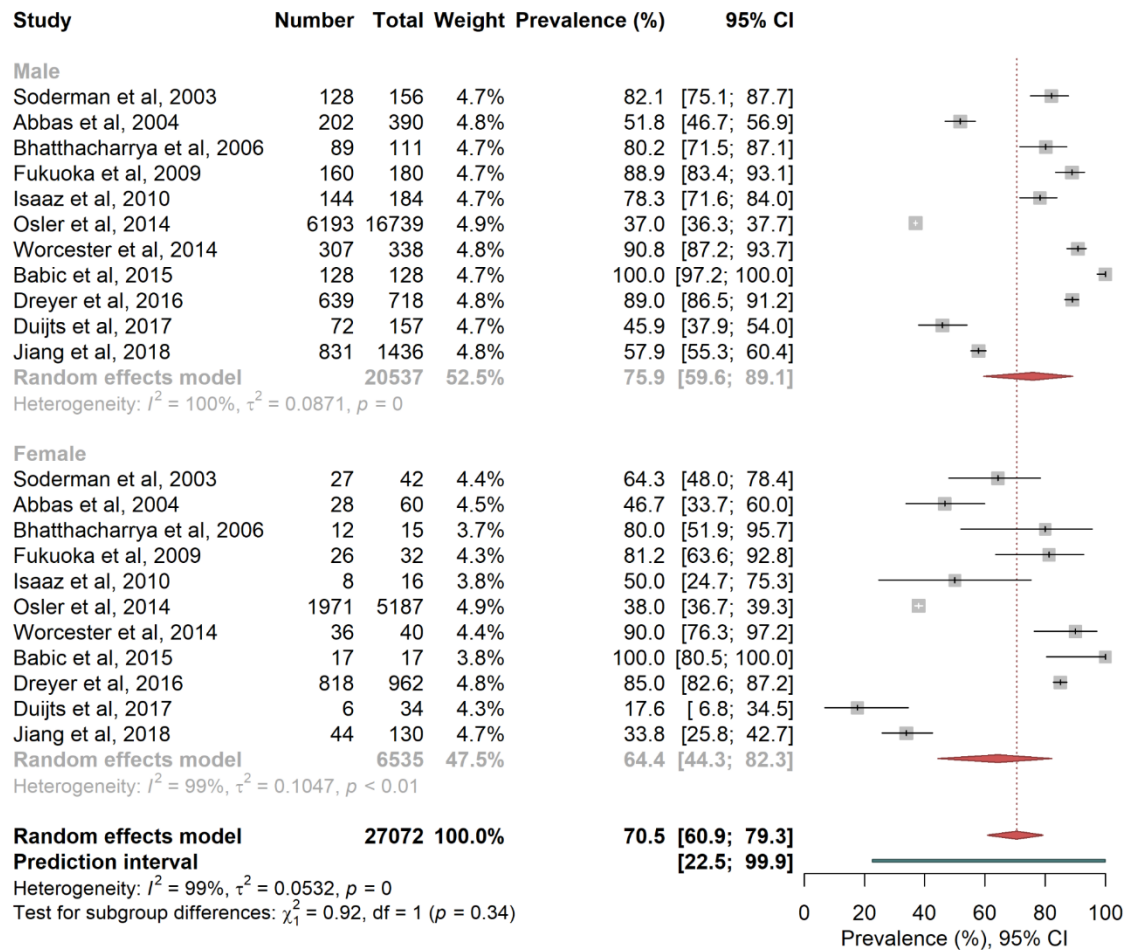

**Supplementary Figure S11.** Random-effects meta-analysis of return-to-work prevalence according to age. The squares and horizontal lines correspond to the study-specific prevalence and 95% CIs. Proportionally sized boxes represent the weight of each study. The diamond represents the pooled prevalence and 95% CI of the overall population. The horizontal thick line corresponds to the 95% prediction interval

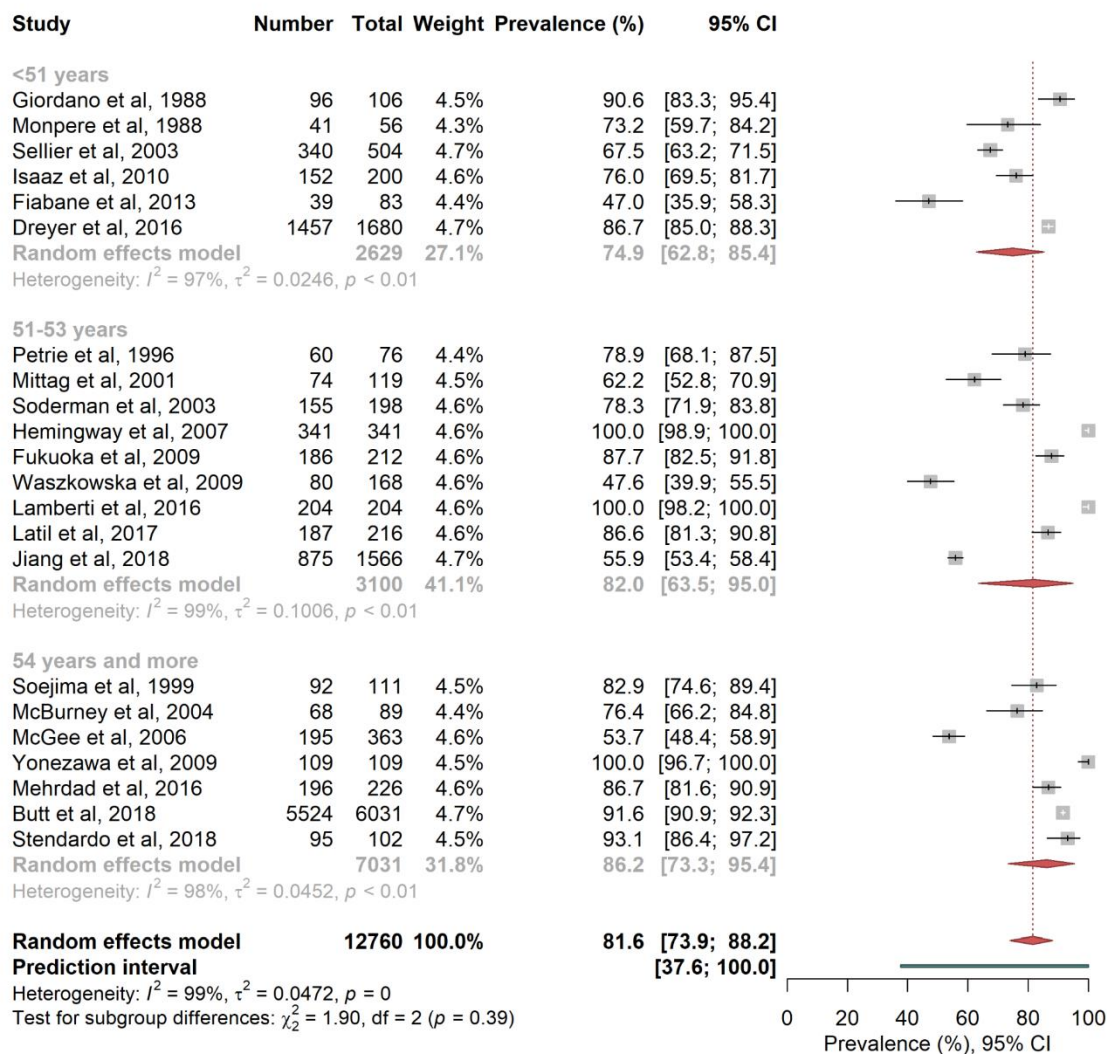

**Supplementary Figure S12.** Random-effects meta-analysis of return-to-work prevalence according to left ventricular ejection fraction (LVEF). The squares and horizontal lines correspond to the study-specific prevalence and 95% CIs. Proportionally sized boxes represent the weight of each study. The diamond represents the pooled prevalence and 95% CI of the overall population. The horizontal thick line corresponds to the 95% prediction interval

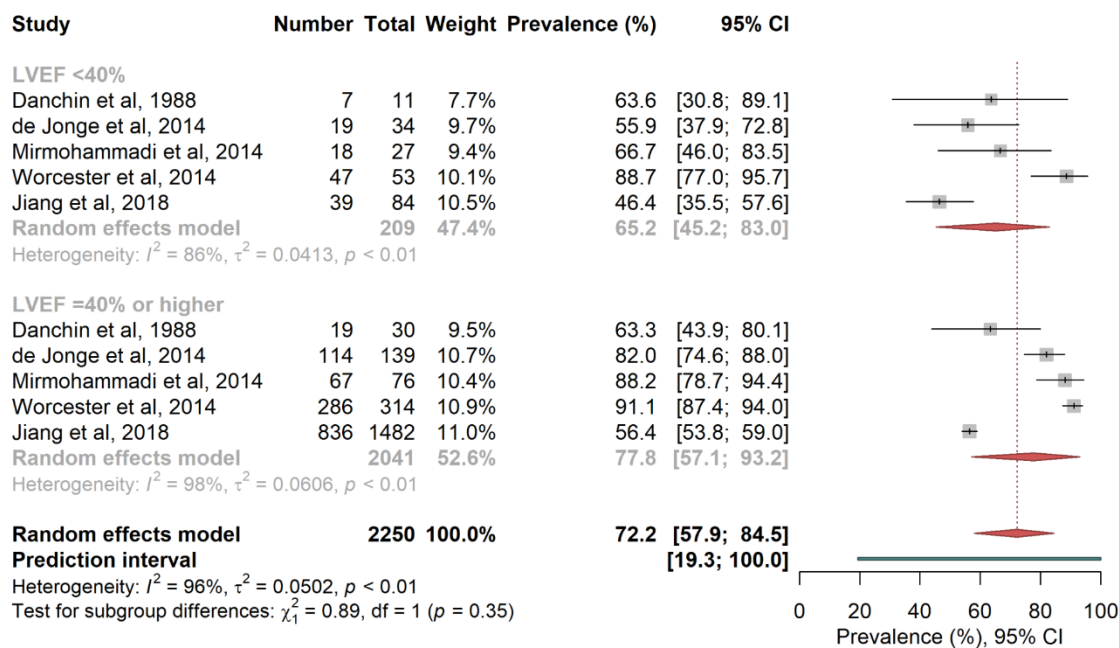

**Supplementary Figure S13.** Random-effects meta-analysis of return-to-work prevalence according to education level. The squares and horizontal lines correspond to the study-specific prevalence and 95% CIs. Proportionally sized boxes represent the weight of each study. The diamond represents the pooled prevalence and 95% CI of the overall population. The horizontal thick line corresponds to the 95% prediction interval

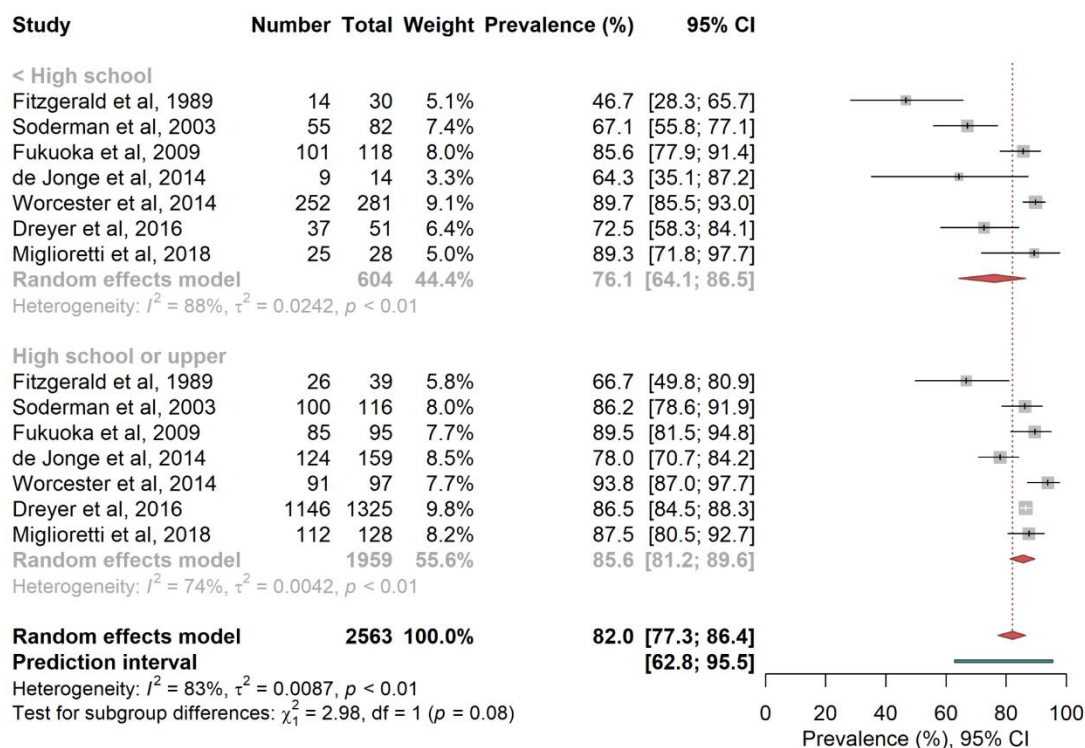

**Supplementary Figure S14.** Random-effects meta-analysis of return-to-work prevalence according to treatment. The squares and horizontal lines correspond to the study-specific prevalence and 95% CIs. Proportionally sized boxes represent the weight of each study. The diamond represents the pooled prevalence and 95% CI of the overall population. The horizontal thick line corresponds to the 95% prediction interval. CABG, coronary artery bypass graft surgery; PCTA, percutaneous coronary transluminal angioplasty

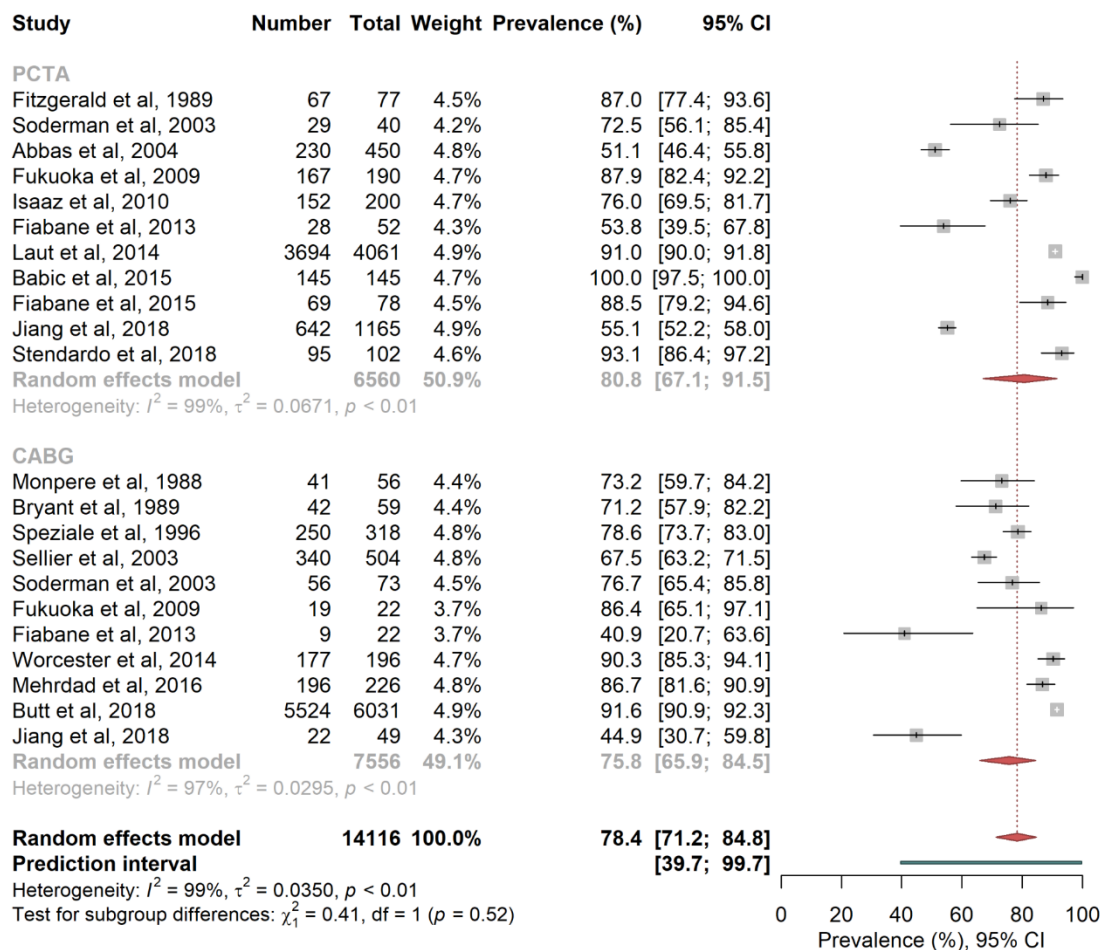

Supplement: 41598_2022_19467_MOESM1_ESM.pdf [file 41598_2022_19467_MOESM1_ESM.pdf]
