# Supplementary material for: Prevalence and determinants of return to work after various coronary events: meta-analysis of prospective studies
Source: PubMed Central journal article supplement (PMC9468005; doi:10.1038/s41598-022-19467-z), 2022-09-12
Supplement: 41598_2022_19467_MOESM2_ESM.pdf [file 41598_2022_19467_MOESM2_ESM.pdf]

**Supplementary Table S1.** Description of the studies included in the meta-analysis

| <b>Study</b>                  | <b>Country, recruitment site and period</b>                               | <b>Study size (n) and % of men</b> | <b>Follow-up, days<sup>a</sup></b> | <b>Age, years<sup>b</sup></b> | <b>Coronary event</b> | <b>Disease definition</b> | <b>RTW evaluation</b> | <b>Number of RTW</b> |
|-------------------------------|---------------------------------------------------------------------------|------------------------------------|------------------------------------|-------------------------------|-----------------------|---------------------------|-----------------------|----------------------|
| <b>Danchin, 1988 [20]</b>     | France; Nancy university hospital, Cardiology department; 1985            | 41 (100)                           | 1095.75                            | NA                            | MI                    | clinical                  | self-reported         | 26                   |
| <b>Fioretti, 1988 [21]</b>    | The Netherlands; Rotterdam, coronary care unit, thorax center; 1981-1983  | 100 (NA)                           | 90                                 | NA                            | MI                    | clinical                  | self-reported         | 58                   |
| <b>Giordano, 1988 [22]</b>    | Italy; hospital; 1987                                                     | 106 (100)                          | 117 (51)                           | 49 (8)                        | MI                    | clinical                  | self-reported         | 96                   |
| <b>Monpere, 1988 [23]</b>     | France ; Tours, rehabilitation center 'Bois Gibert'; 1987                 | 57 (98.2)                          | 210 (NA)                           | 50.7 (NA)                     | CABG                  | clinical                  | not self-report       | 41                   |
| <b>Bryant, 1989 [24]</b>      | England; Oxford cardiac department; 1986                                  | 59 (100)                           | 365                                | NA                            | Angina, surgery       | clinical                  | self-reported         | 42                   |
| <b>Fitzgerald, 1989 [25]</b>  | USA; Baltimore, Johns Hopkins Hospital                                    | 77 (NA)                            | 180                                | NA                            | PTCA                  | clinical                  | self-reported         | 67                   |
| <b>Abbott, 1991 [26]</b>      | England; Royal Preston Hospital, Coronary Care Unit; 1989                 | 57 (100)                           | 365                                | NA                            | MI                    | clinical                  | self-reported         | 32                   |
| <b>McGee, 1993 [27]</b>       | Ireland; Dublin, National Cardiothoracic Unit; 1989                       | 102 (NA)                           | 540                                | NA                            | PCTA, CABG            | clinical                  | self-reported         | 102                  |
| <b>Christensen, 1995 [28]</b> | Denmark; Aalborg Hospital, Department of Cardiology; 1988-1989            | 62 (83.9)                          | 540                                | NA                            | MI                    | clinical                  | self-reported         | 29                   |
| <b>Petrie, 1996 [29]</b>      | New Zealand; Auckland and North Shore Hospitals; 1993-?                   | 76 (93.4)                          | 180                                | 53.1 (7.2)                    | MI                    | clinical                  | self-reported         | 60                   |
| <b>Speziale, 1996 [30]</b>    | Italy; Rome, Institute of Cardiac Surgery, University "La Sapienza"; 1992 | 318 (NA)                           | 1140 (180)                         | NA                            | Angina, CABG          | clinical                  | self-reported         | 250                  |
| <b>Soejima, 1999 [31]</b>     | Japan; Kagoshima City area hospitals; 1992-1996                           | 111 (100)                          | 240 (NA)                           | 54.3 (NA)                     | MI                    | clinical                  | self-reported         | 92                   |
| <b>Mittag, 2001 [32]</b>      | Germany; two hospitals in northern Germany; 1999                          | 119 (0)                            | 365.25                             | 52.3 (5.67)                   | MI, CABG              | clinical                  | self-reported         | 74                   |

|                                  |                                                                                          |            |           |             |                 |           |                                                         |     |
|----------------------------------|------------------------------------------------------------------------------------------|------------|-----------|-------------|-----------------|-----------|---------------------------------------------------------|-----|
| <b>Sellier, 2003 [33]</b>        | France; Cardiac rehabilitation departments; 1998-1999                                    | 504 (94.8) | 365.25    | 50.5 (NA)   | CABG            | clinical  | self-reported                                           | 340 |
| <b>Söderman, 2003 [34]</b>       | Sweden; Local social insurance agencies; 1992-1994                                       | 198 (78.8) | 365.25    | 51.34 (5.3) | MI, CABG, PTCA  | ICD       | self-reported                                           | 155 |
| <b>Abbas, 2004 [35]</b>          | International; Stent Primary Angioplasty in Myocardial Infarction study; hospitals; 1999 | 436 (NA)   | 180       | NA          | PCTA (after MI) | clinical  | self-reported                                           | 353 |
| <b>McBurney, 2004 [36]</b>       | USA; Midwestern academic health system; 1999-2000                                        | 89 (80.9)  | 225 (45)  | 55.5 (10)   | MI              | ICD       | self-reported                                           | 68  |
| <b>Bhatthacharrya, 2006 [37]</b> | England; London hospitals; 2001-2004                                                     | 126 (88.1) | 390       | NA          | ACS             | clinical  | self-reported                                           | 101 |
| <b>McGee, 2006 [38]</b>          | Ireland; 39 centers with intensive/coronary care unit; 2003                              | 363 (NA)   | 360       | 63 ± 12     | ACS             | clinical  | self-reported                                           | 195 |
| <b>Hemingway, 2007 [39]</b>      | Finland; 21 public hospitals; 2000-2002                                                  | 341 (37)   | 360       | 52.7 (NA)   | Angina          | interview | not self-report (computerized sickness absence records) | 341 |
| <b>Brink, 2008 [40]</b>          | Sweden; rural hospital, Coronary care unit; 2005-2006                                    | 50 (NA)    | 180       | NA          | MI              | clinical  | self-reported                                           | 40  |
| <b>Fukuoka, 2009 [41]</b>        | USA, Japan; hospital; 2004-2006                                                          | 212 (84.9) | 180       | 53 (NA)     | ACS             | clinical  | self-reported                                           | 186 |
| <b>Waszkowska, 2009 [42]</b>     | Poland; Clinical Department of Cardiology, Medical University of Lodz; 2009              | 168 (100)  | NA        | 53.7 (NA)   | MI              | clinical  | self-reported                                           | 80  |
| <b>Yonezawa, 2009 [43]</b>       | Japan; Cardiovascular center of Kitasato University hospital; 2003-2006                  | 109 (82.6) | 180       | 57 (7)      | MI              | clinical  | self-reported                                           | 109 |
| <b>Isaaz, 2010 [44]</b>          | France; Cardiology department North hospital, CHU de Saint-Étienne; 2000-2004            | 200 (92)   | 1260 (NA) | 48 (7)      | ACS, PCTA       | clinical  | self-reported                                           | 152 |
| <b>Fiabane, 2013 [59]</b>        | Italy; hospital; 2006-2010                                                               | 83 (94)    | 60        | 49.3 (8.04) | PCTA, CABG      | clinical  | self-reported                                           | 39  |

|                                |                                                                                                                  |                |                    |                |           |                 |                                                                           |       |
|--------------------------------|------------------------------------------------------------------------------------------------------------------|----------------|--------------------|----------------|-----------|-----------------|---------------------------------------------------------------------------|-------|
| <b>de Jonge, 2014 [45]</b>     | Netherlands; hospitals; 1997-2000                                                                                | 173<br>(90.8)  | 365.25             | NA             | MI        | clinical        | self-reported                                                             | 133   |
| <b>Laut, 2014 [46]</b>         | Denmark; Aalborg, Gentofte, Odense, Rigshospitalet, and Aarhus University Hospital in Skejby; 1999-2011          | 4061<br>(84.6) | 1461               | NA             | ACS, PCTA | clinical        | not self-reported (National Register on Public Transfer Payments (DREAM)) | 3694  |
| <b>Mirmohammadi, 2014 [47]</b> | Iran; hospital; 2007-2010                                                                                        | 174<br>(NA)    | 365.25             | NA             | MI        | clinical        | self-reported                                                             | 134   |
| <b>Osler, 2014 [48]</b>        | Denmark; National Patient Register; 2001-2009                                                                    | 15468<br>(NA)  | 1826.25            | NA             | ACS       | ICD             | not self-reported (National Register on Public Transfer Payments (DREAM)) | 10079 |
| <b>Worcester, 2014 [49]</b>    | Australia; Cardiothoracic Surgical Unit of the Royal Melbourne hospital or Melbourne private hospital; 2008-2010 | 378<br>(89.4)  | 365.25             | NA             | ACS, CABG | clinical        | self-reported                                                             | 343   |
| <b>Babic, 2015 [50]</b>        | Croatia; Zagreb Hospital Coronary Care Unit; 2008-2011                                                           | 145<br>(88.3)  | 836.12<br>(241.63) | NA             | ACS, PCTA | clinical        | self-reported                                                             | 145   |
| <b>Fiabane, 2015 [60]</b>      | Italy; Research and Care Delivery Institution for multidisciplinary Cardiac Rehabilitation; 2006-2011            | 78<br>(80.8)   | 365.25             | NA             | PCTA      | clinical        | self-reported                                                             | 69    |
| <b>Dreyer, 2016 [51]</b>       | USA, Spain, Australia; VIRGO study, hospitals; 2008-2012                                                         | 1680<br>(42.7) | 365.25             | 48 (8)         | MI        | clinical        | self-reported                                                             | 1457  |
| <b>Lamberti, 2016 [52]</b>     | Italy; Naples hospital; 2014                                                                                     | 204<br>(97.5)  | 180                | 51 (8)         | ACS       | clinical        | self-reported                                                             | 204   |
| <b>Mehrdad, 2016 [61]</b>      | Iran; hospital; 2013-2014                                                                                        | 226<br>(99.1)  | 180                | 54.2<br>(8.93) | CABG      | clinical        | self-reported                                                             | 196   |
| <b>Duijts, 2017 [53]</b>       | England; General population; 2002-2010                                                                           | 191<br>(82.2)  | 730.5              | NA             | MI        | interview       | self-reported                                                             | 78    |
| <b>Latil, 2017 [54]</b>        | France; hospital; 2011-2012                                                                                      | 216<br>(97.2)  | 365.25             | 53.5<br>(7)    | ACS       | clinical        | not self-reported                                                         | 187   |
| <b>Butt, 2018 [58]</b>         | Denmark; Nationwide administrative registries; 1998-2011                                                         | 6031<br>(88.9) | 730.5              | 55<br>(47, 63) | CABG      | procedure codes | not self-reported                                                         | 5524  |

|                                        |                                                                                                   |                |        |                   |               |          |                       |     |
|----------------------------------------|---------------------------------------------------------------------------------------------------|----------------|--------|-------------------|---------------|----------|-----------------------|-----|
| <b>Jiang, 2018 [55]</b>                | China; hospital;<br>2013-2014                                                                     | 1566<br>(91.7) | 365.25 | 52.2<br>(NA)      | MI            | clinical | not self-<br>reported | 875 |
| <b>Korzeniowska-Kubacka, 2018 [56]</b> | Poland; hospital;<br>2017                                                                         | 38<br>(63.2)   | NA     | NA                | MI            | clinical | self-reported         | 38  |
| <b>Miglioretti, 2018 [62]</b>          | Italy; hospital;<br>2013-2014                                                                     | 70<br>(NA)     | 180    | NA                | PCTA,<br>CABG | clinical | self-reported         | 63  |
| <b>Stendardo, 2018 [57]</b>            | Italy; Department<br>of Cardiology of<br>the University-<br>Hospital of<br>Ferrara; 2015-<br>2016 | 102<br>(88.2)  | 365.25 | 56<br>(50,<br>60) | MI            | clinical | self-reported         | 95  |

Table 1 Legend : ACS, acute coronary syndrome; CABG, coronary artery bypass graft surgery; ICD, International Classification of Diseases; MI, myocardial infarction; NA, not available; PCTA, percutaneous coronary transluminal angioplasty; RTW, return to work.

<sup>a</sup>Longest follow-up in days (maximum or mean (standard deviation)); <sup>b</sup>Age in years (mean (standard deviation), median (interquartile range))

**Supplementary Table S2. Studies settings**

---

|                       | n (%)     |
|-----------------------|-----------|
| <b>Regions</b>        |           |
| America               | 2 (4.7)   |
| Europe                | 31 (72.1) |
| Eastern Mediterranean | 2 (4.7)   |
| Western Pacific       | 5 (11.6)  |
| International         | 3 (7.0)   |
| <b>Setting</b>        |           |
| Hospital              | 39 (90.7) |
| Population register   | 3 (7.0)   |
| Insurance database    | 1 (2.3)   |

---

**Supplementary Table S3.** Return to work prevalence, by type of events, according to the characteristics of the studies and the clinical and socio-professional characteristics of the patients

|                                        |                   | Acute event |       |              |                |                | Stable angina |       |              |                |                |
|----------------------------------------|-------------------|-------------|-------|--------------|----------------|----------------|---------------|-------|--------------|----------------|----------------|
|                                        |                   | No.         | RTW % | [95%-CI]     | I <sup>2</sup> | P <sup>a</sup> | No.           | RTW % | [95%-CI]     | I <sup>2</sup> | P <sup>a</sup> |
| <b>All studies (longest follow-up)</b> |                   | 26          | 80.3% | [73.6; 86.2] | 99.0           |                | 13            | 83.6% | [73.7; 91.6] | 98.3           |                |
| <b>Follow-up</b>                       | ]0 - 3] months    | 9           | 47.1% | [40.6; 53.7] | 97.5           | < 0.001        | 4             | 47.4% | [40.5; 54.4] | 49.1           | < 0.001        |
|                                        | ]3 - 6] months    | 7           | 87.5% | [73.9; 96.7] | 96.8           |                | 4             | 88.2% | [85.1; 91.0] | 0.0            |                |
|                                        | ]6 - 12] months   | 13          | 74.4% | [59.1; 87.2] | 99.8           |                | 5             | 84.9% | [69.5; 95.6] | 98.7           |                |
|                                        | >12 months        | 6           | 78.2% | [60.7; 91.6] | 99.7           |                | 4             | 83.0% | [60.0; 97.4] | 99.1           |                |
| <b>Recruitment date</b>                | <2001             | 11          | 73.1% | [63.6; 81.6] | 96.1           | 0.042          | 8             | 89.2% | [79.5; 96.1] | 98.1           | 0.142          |
|                                        | ≥2001             | 15          | 85.1% | [77.1; 91.6] | 99.0           |                | 5             | 72.8% | [48.4; 91.6] | 97.5           |                |
| <b>Disease definition</b>              | Clinical          | 24          | 81.1% | [73.8; 87.4] | 98.5           | 0.081          | 10            | 83.1% | [73.5; 90.9] | 95.1           | 0.073          |
|                                        | ICD               | 2           | 69.9% | [58.7; 80.0] | 80.7           |                | 1             | 91.6% | [90.9; 92.3] | -              |                |
|                                        | Interview         | 0           | -     | -            | -              |                | 2             | 81.1% | [7.8; 100.0] | 99.7           |                |
| <b>Outcome definition</b>              | Self-reported     | 22          | 81.1% | [73.6; 87.6] | 97.0           | 0.612          | 11            | 79.8% | [68.3; 89.3] | 96.6           | 0.039          |
|                                        | Not self-reported | 4           | 76.1% | [57.2; 90.8] | 99.8           |                | 2             | 97.5% | [83.1; 100]  | 98.9           |                |
| <b>NOS-scale score</b>                 | 7 stars or more   | 15          | 80.6% | [72.3; 87.9] | 99.3           | 0.912          | 9             | 84.1% | [73.3; 92.6] | 98.0           | 0.913          |
|                                        | <7 stars          | 11          | 79.9% | [62.8; 92.7] | 98.0           |                | 4             | 82.6% | [53.6; 99.0] | 98.5           |                |
| <b>WHO region</b>                      | International     | 3           | 85.2% | [81.1; 88.9] | 78.6           | 0.127          | 0             | -     | -            | -              | 0.782          |
|                                        | Europe            | 17          | 79.0% | [69.3; 87.3] | 99.2           |                | 11            | 83.0% | [71.2; 92.2] | 98.6           |                |
|                                        | Western Pacific   | 4           | 83.4% | [54.3; 99.3] | 98.7           |                | 0             | -     | -            | -              |                |
|                                        | America           | 1           | 76.4% | [67.0; 84.7] | -              |                | 1             | 87.0% | [78.5; 93.7] | -              |                |

|                                           |                       |   |                    |      |       |   |                    |      |        |
|-------------------------------------------|-----------------------|---|--------------------|------|-------|---|--------------------|------|--------|
|                                           | Eastern Mediterranean | 1 | 77.0% [70.4; 83.0] | -    |       | 1 | 86.7% [82.0; 90.9] | -    |        |
| <b>Gender</b>                             | Male                  | 8 | 76.3% [57.6; 90.8] | 99.6 | 0.478 | 1 | 45.9% [38.1; 53.7] | -    | 0.002  |
|                                           | Female                | 8 | 66.5% [42.6; 86.8] | 99.2 |       | 1 | 17.7% [6.4; 32.5]  | -    |        |
| <b>Age</b>                                | <51 years             | 2 | 82.0% [70.3; 91.3] | 92.9 | 0.944 | 3 | 70.2% [47.7; 88.5] | 95.9 | <0.001 |
|                                           | 51-53 years           | 6 | 80.0% [58.1; 95.2] | 99.0 |       | 1 | 100.0% [99.5; 100] | -    |        |
|                                           | 54 years and more     | 5 | 84.9% [61.6; 98.5] | 98.0 |       | 2 | 89.7% [84.4; 94.0] | 82.5 |        |
| <b>Education level</b>                    | < High school         | 4 | 74.5% [62.2; 85.2] | 74.0 | 0.054 | 2 | 70.0% [24.7; 99.5] | 92.1 | 0.699  |
|                                           | ≥ High school         | 4 | 85.2% [80.8; 89.1] | 64.0 |       | 2 | 78.8% [55.4; 95.3] | 87.2 |        |
| <b>Socio professional category</b>        | White-collar          | 4 | 79.5% [48.1; 98.6] | 97.3 | 0.719 | 2 | 63.0% [54.6; 71.0] | 0.0  |        |
|                                           | Blue-collar           | 4 | 71.2% [31.6; 97.9] | 97.7 |       | 2 | 35.9% [28.4; 43.8] | 0.0  |        |
| <b>Occupational physical activity</b>     | Low                   | 4 | 79.5% [48.1; 98.6] | 97.3 | 0.719 | 2 | 57.2% [44.4; 69.5] | 63.5 | 0.005  |
|                                           | High                  | 4 | 71.2% [31.6; 97.9] | 97.7 |       | 2 | 33.4% [23.8; 43.6] | 0.0  |        |
| <b>Left Ventricular Ejection Fraction</b> | <40%                  | 4 | 54.7% [44.7; 64.4] | 23.9 | 0.086 | 0 | - -                | -    | -      |
|                                           | ≥40%                  | 4 | 73.6% [53.9; 89.4] | 95.9 |       | 0 | - -                | -    |        |
| <b>Treatment</b>                          | PCTA                  | 7 | 82.8% [65.3; 95.0] | 99.4 | 0.419 | 3 | 78.3% [56.4; 94.2] | 91.3 | 0.839  |
|                                           | CABG                  | 2 | 66.3% [23.8; 97.5] | 91.5 |       | 6 | 75.8% [62.1; 87.3] | 98.1 |        |

CABG, coronary artery bypass graft surgery; CI, confidence interval; ICD, International Classification of Diseases; N°, number of studies; NOS, Newcastle-Ottawa scale; P, p-value; PCTA, percutaneous coronary transluminal angioplasty; RTW %, return to work prevalence.

\*Between group difference
